# Supplementary material for: First Aid Knowledge, Attitude, Practice, and its Associated Factors among Kindergarten Teachers in Jimma Town, Southwest Ethiopia, 2024 (Mixed Method Approach)
Source: Research Square preprint supplement (doi:10.21203/rs.3.rs-8213429/v1), 2026-01-12
Supplement: Supplementary file 1 [file 8490ee8de877b1069b70dce8.docx]

**In-depth interview guide and Qualitative questions**

**Jimma University, Institute of Health, Faculty of Public Health, Department of Epidemiology.**

Welcome, and thank you for agreeing to talk with me today. My name is Alelign Nigatu, a student of a Master's of General Public Health, and I am working on research on “First Aid Knowledge, Attitude, Practice and its Associated Factors among Kindergarten Teachers in Jimma Town, Southwest Ethiopia 2024. The goal of this study is to understand the barriers and challenges of ‘First Aid Knowledge, Attitude, Practice, and Associated Factors among Kindergarten Teachers in Jimma Town, Southwest Ethiopia 2024’. Before we get started today, here are a few important things to know:

- I am here to learn from you; there is no right or wrong answer, and I was interested in your opinions.
- If you have any questions, you can ask me. Your participation is voluntary, so you can refuse or you can stop the interview at intervals if you are not comfortable with it.
- I will keep the discussion confidential, and I will do my best to protect your privacy.
- When we start the discussion, I will turn on a tape recorder and record the rest of the discussion. This audiotape was transformed into a written document.
- This can take about 30 minutes.

School code _______

Age ______ Sex _______

Participant sign ____________ date ____________Time ____________

**The Questions**

1. What is first aid for you? And what is its Importance? Probe

2. What type of first aid material do you know? Mention their use? Probe

3. Do you think that knowing first aid is important for you and your institution? Probe?

4. What barriers and facilitators do you think influence the overall implementation of first aid in a kindergarten setting? Mention. Probe

5. What is the role of Teachers and your institution in improving the implementation of first aid? How? Probe?

**Thank you for taking the time for this in-depth discussion!**
